# Supplementary material for: Molecular Evolutionary Rate Predicts Intraspecific Genetic Polymorphism and Species-Specific Selection
Source: MDPI journal article supplement (doi:10.3390/genes13040708), 2022-04-17

**Chimpanzee**

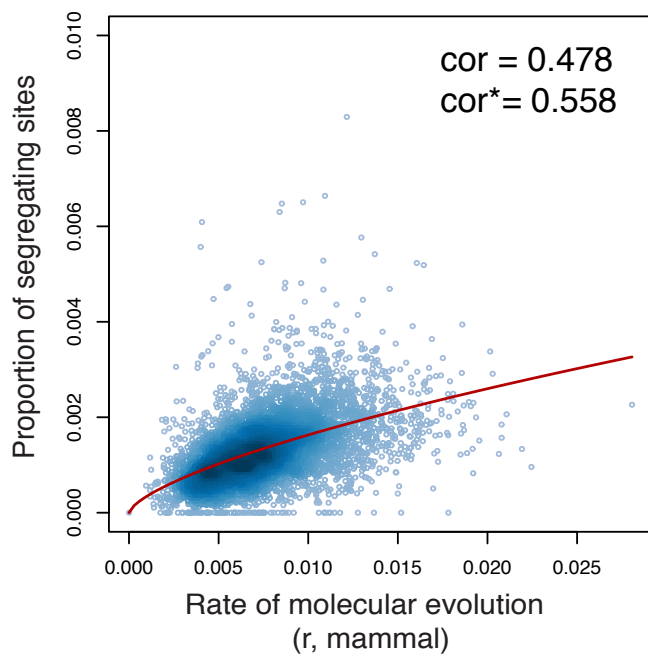

**Gorilla**

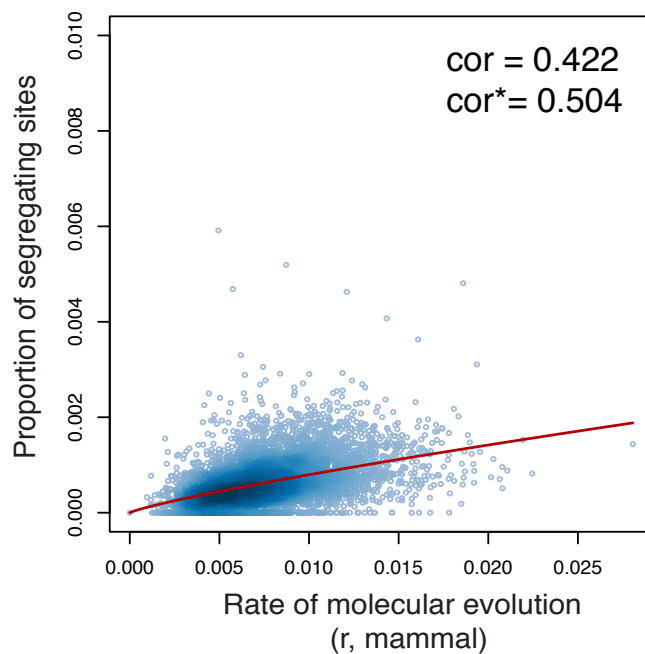

**Mouse**

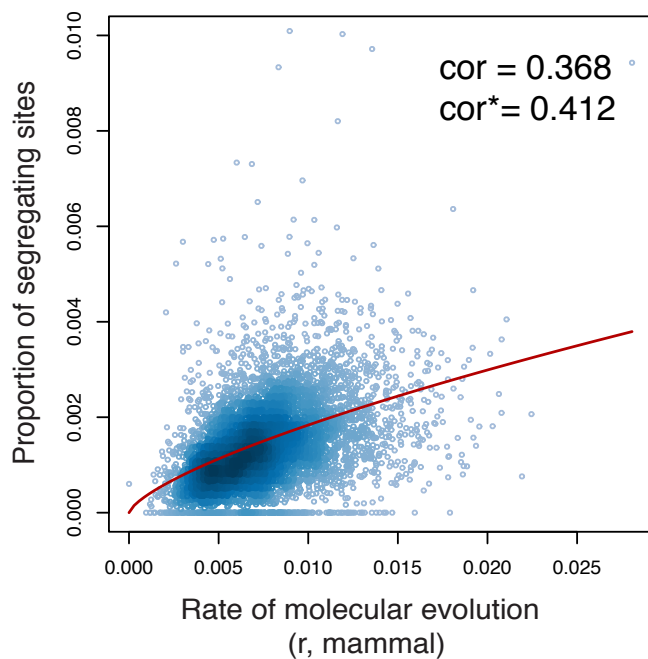

**Dog/wolf**

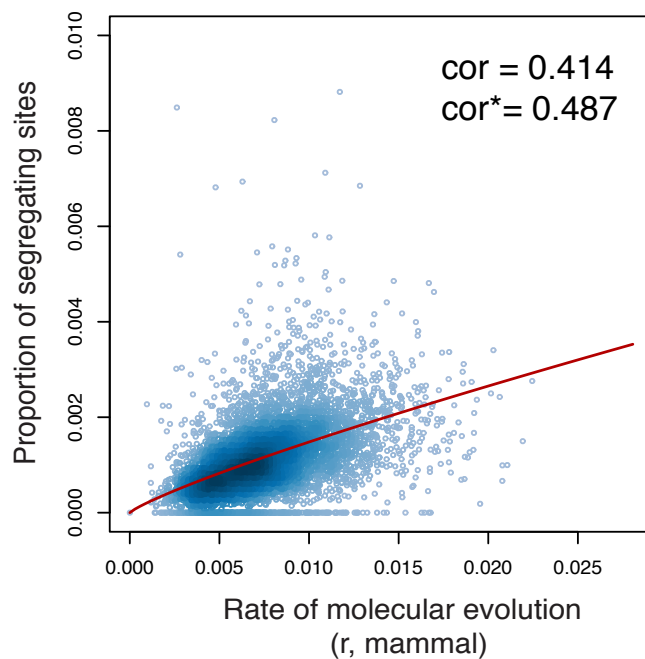

Supplement: s1 [file s1]
